# Supplementary material for: Phase 2 study of cemiplimab in patients with metastatic cutaneous squamous cell carcinoma: primary analysis of fixed-dosing, long-term outcome of weight-based dosing
Source: PubMed Central journal article supplement — J Immunother Cancer. 2020 Jun 17;8(1):e000775. doi: 10.1136/jitc-2020-000775 (PMC7304829; doi:10.1136/jitc-2020-000775), 2020-06-17
Supplement: jitc-2020-000775supp001.pdf [file jitc-2020-000775supp001.pdf]

## 1 Supplementary material

### 2 Supplement 1. Study sites and principal investigators

#### 3 Phase 2 Group 3 cemiplimab in patients with advanced cutaneous squamous 4 cell carcinoma study sites and principal investigators

| Site                                                                              | Principal investigator | Patients recruited |
|-----------------------------------------------------------------------------------|------------------------|--------------------|
| Royal North Shore Hospital, St Leonards, New South Wales, Australia               | Alexander Guminski     | 8                  |
| Peter Maccallum Cancer Centre, East Melbourne, Victoria, Australia                | Danny Rischin          | 7                  |
| Sir Charles Gairdner Hospital, Nedlands, Western Australia, Australia             | Annette Lim            | 7                  |
| H Lee Moffitt Cancer Center and Research Institute, Tampa, Florida, United States | Nikhil Khushalani      | 6                  |
| Dana Farber Cancer Institute, Boston, Massachusetts, United States                | Chrysalynne Schmults   | 5                  |
| Washington University, St. Louis, Missouri, United States                         | Leonel Hernandez Aya   | 4                  |
| City of Hope, Duarte, California, United States                                   | Badri Modi             | 3                  |
| Memorial Sloan Kettering Cancer Center, New York, United States                   | Lara Dunn              | 3                  |
| Royal Brisbane & Women's Hospital, Brisbane, Australia                            | Brett Hughes           | 2                  |
| Stanford Cancer Center, Redwood City, California, United States                   | Anne Lynn Chang        | 2                  |
| Universitätsklinikum Schleswig-Holstein, Kiel, Germany                            | Axel Hauschild         | 1                  |
| Medizinische Hochschule Hannover, Hannover, Germany                               | Ralf Gutzmer           | 1                  |
| Universitätsklinikum Essen, Essen, Germany                                        | Dirk Schadendorf       | 1                  |
| Charité Campus Mitte, Berlin, Germany                                             | Claas Ulrich           | 1                  |
| Universitätsklinikum Tübingen, Tübingen, Germany                                  | Thomas Eigentler       | 1                  |

---

|                                                                                          |                   |   |
|------------------------------------------------------------------------------------------|-------------------|---|
| LMU Klinikum der Universität München, München, Germany                                   | Carola Berking    | 1 |
| University of Colorado, Aurora, Colorado, United States                                  | Karl Lewis        | 1 |
| University of California Los Angeles, Los Angeles, California, United States             | Deborah Wong      | 1 |
| Nebraska Methodist Hospital, Omaha, Nebraska, United States                              | Yungpo Su         | 1 |
| Northwestern University, Chicago, Illinois, United States                                | Sunandana Chandra | 1 |
| Huntsman Cancer Institute at The University of Utah, Salt Lake City, Utah, United States | Benjamin Voorhies | 1 |
| University of Rochester Medical Center, Rochester, New York, United States               | Sherrif Ibrahim   | 1 |

---

5

**6 Phase 2 Group 1 cemiplimab in patients with advanced cutaneous squamous**  
**7 cell carcinoma study sites and principal investigators**

| <b>Site</b>                                                                | <b>Principal investigator</b> | <b>Patients recruited</b> |
|----------------------------------------------------------------------------|-------------------------------|---------------------------|
| Peter MacCallum Cancer Centre, East Melbourne, Victoria, Australia         | Danny Rischin                 | 10                        |
| Royal Brisbane & Women's Hospital, Brisbane, Australia                     | Brett Hughes                  | 4                         |
| Royal North Shore Hospital, St Leonards, New South Wales, Australia        | Alexander Guminski            | 4                         |
| Universitätsklinikum Essen, Essen, Germany                                 | Dirk Schadendorf              | 4                         |
| Dana Farber Cancer Institute, Boston, Massachusetts, United States         | Chrysalyne Schmults           | 3                         |
| Sir Charles Gairdner Hospital, Nedlands, Western Australia, Australia      | Annette Lim                   | 2                         |
| Adelaide Cancer Centre, Kurrulta Park, South Australia, Australia          | Brian Stein                   | 2                         |
| Universitätsklinikum Schleswig-Holstein, Kiel, Germany                     | Axel Hauschild                | 2                         |
| Charité Campus Mitte, Berlin, Germany                                      | Claas Ulrich                  | 2                         |
| Universitätsklinikum Tübingen, Tübingen, Germany                           | Thomas Eigentler              | 2                         |
| MD Anderson Cancer Center, Houston, Texas, United States                   | Michael Migden                | 2                         |
| Memorial Sloan Kettering Cancer Center, New York, United States            | Lara Dunn                     | 2                         |
| Stanford Cancer Center, Redwood City, California, United States            | Anne Lynn Chang               | 2                         |
| NYU Clinical Cancer Center, New York, United States                        | Anna Pavlick                  | 2                         |
| Cleveland Clinic, Cleveland, Ohio, United States                           | Jessica Geiger                | 2                         |
| Universitätsklinikum Carl Gustav Carus an der TU Dresden, Dresden, Germany | Friedegund Meier              | 1                         |
| LMU Klinikum der Universität München, München, Germany                     | Carola Berking                | 1                         |
| City of Hope, Duarte, California, United States                            | Badri Modi                    | 1                         |

---

|                                                                                          |                      |   |
|------------------------------------------------------------------------------------------|----------------------|---|
| University of Colorado, Aurora, Colorado, United States                                  | Karl Lewis           | 1 |
| University of California Los Angeles, Los Angeles, California, United States             | Deborah Wong         | 1 |
| H Lee Moffitt Cancer Center and Research Institute, Tampa, Florida, United States        | Nikhil Khushalani    | 1 |
| Washington University, St. Louis, Missouri, United States                                | Leonel Hernandez Aya | 1 |
| Huntsman Cancer Institute at The University of Utah, Salt Lake City, Utah, United States | Benjamin Voorhies    | 1 |
| Mount Sinai Comprehensive Cancer Center, Miami Beach, Florida, United States             | Jose Lutzky          | 1 |
| St. Luke's Hematology Oncology Specialists, Easton, Pennsylvania, United States          | Sanjiv Agarwala      | 1 |
| Massachusetts General Hospital, Boston, Massachusetts, United States                     | Chrysalyne Schmults  | 1 |

---

8

## 9 **Supplement 2. Additional details on study methods**

### 10 **Details of tumor response assessments**

11 Response assessments included radiologic scans (assessed per RECIST 1.1) for all  
12 patients, and digital medical photography (assessed per modified World Health  
13 Organization criteria) for patients with externally visible lesions. Composite response  
14 criteria were used for patients with both radiologic and photographic assessments.  
15 All radiologic response assessments were reviewed by a blinded ICR committee of  
16 radiologists. All digital medical photography assessments were reviewed by a  
17 blinded ICR committee of dermatology-oncology experts. For patients with only  
18 radiologic assessments (no photography), only the assessments of the radiology ICR  
19 were required. For patients with both photographic and radiologic assessments,  
20 efficacy assessments were rendered by a multidisciplinary composite ICR committee  
21 that integrated the outputs of the radiology ICR committee and the photography ICR  
22 committee. For the Group 1 update, ICR committee members had discretion to  
23 revise assessments for previously reviewed timepoints if they felt it to be clinically  
24 appropriate upon review of additional imaging timepoints after the primary analysis.

### 25 **Details of tumor biomarker procedures**

26 Archived tumor samples from prior CSCC biopsies or surgeries were provided during  
27 the screening period. TMB was estimated in DNA samples extracted from  
28 formalin-fixed paraffin-embedded (FFPE) tumor biopsies. Genomic DNA was  
29 isolated from FFPE tissue using the QIAamp DNA FFPE Kit (Qiagen) and quantified  
30 using the Qubit® Fluorometer, following slide macrodissection to ensure >20% tumor  
31 content. Sequencing library was prepared using the TruSight Oncology 500®  
32 (TSO500) assay kit (Illumina). Briefly, tumor DNA (40ng/sample) was sheared using

33 a Covaris sonicator, followed by end base repair, A-tailing, adapter ligation and  
34 bead-based purification. Adapter-ligated samples were Polymerase Chain Reaction  
35 amplified to incorporate barcodes for sample multiplexing, followed by hybridization-  
36 based target region enrichment, library amplification and sequencing using the  
37 NovaSeq® platform. TMB was calculated as the total number of somatic single  
38 nucleotide variants and indels in the coding regions of targeted genes per megabase  
39 of analyzed genomic sequence. Germline and oncogenic driver gene variants were  
40 excluded from somatic mutations, according to the public database comparisons. In  
41 order to reduce the effect of FFPE DNA deamination artefacts on mutational variant  
42 calling, sequence reads from complementary DNA strands were identified using  
43 unique molecular identifier barcodes included in the assay protocol during the  
44 sequencing library generation.
