# Supplementary material for: Phase 2 study of cemiplimab in patients with metastatic cutaneous squamous cell carcinoma: primary analysis of fixed-dosing, long-term outcome of weight-based dosing
Source: PubMed Central journal article supplement — J Immunother Cancer. 2020 Jun 17;8(1):e000775. doi: 10.1136/jitc-2020-000775 (PMC7304829; doi:10.1136/jitc-2020-000775), 2020-06-17
Supplement: jitc-2020-000775supp003.pdf [file jitc-2020-000775supp003.pdf]

## 1 Supplementary Table 1. Tumor response per investigator assessment

|                                                             | <b>Group 3</b>       | <b>Group 1</b>        | <b>Total</b>          |
|-------------------------------------------------------------|----------------------|-----------------------|-----------------------|
|                                                             | <b>Cemiplimab</b>    | <b>Cemiplimab</b>     | <b>(Groups 1 + 3)</b> |
|                                                             | <b>350 mg IV Q3W</b> | <b>3 mg/kg IV Q2W</b> | <b>(n=115)</b>        |
|                                                             | <b>(n=56)</b>        | <b>(n=59)</b>         |                       |
| ORR, % (95% CI)                                             | 51.8 (38.0–65.3)     | 49.2 (35.9–62.5)      | 50.4 (41.0–59.9)      |
| Best overall response, n (%)                                |                      |                       |                       |
| Complete response                                           | 3 (5.4)              | 4 (6.8)               | 7 (6.1)               |
| Partial response                                            | 26 (46.4)            | 25 (42.4)             | 51 (44.3)             |
| Stable disease                                              | 11 (19.6)            | 14 (23.7)             | 25 (21.7)             |
| Progressive disease                                         | 12 (21.4)            | 11 (18.6)             | 23 (20.0)             |
| Not evaluable                                               | 4 (7.1)              | 5 (8.5)               | 9 (7.8)               |
| Disease control rate (95% CI)                               | 71.4 (57.8–82.7)     | 72.9 (59.7–83.6)      | 72.2 (63.0–80.1)      |
| Durable disease control rate*, % (95% CI)                   | 60.7 (46.8–73.5)     | 64.4 (50.9–76.4)      | 62.6 (53.1–71.5)      |
| Median time to response, months (range)                     | 2.1 (1.4–10.3)       | 1.9 (1.7–9.2)         | 2.1 (1.4–10.3)        |
| Kaplan–Meier 8-month estimate of DOR (95% CI) <sup>†</sup>  | 100 (Not evaluable)  | 92.9 (74.3–98.2)      | 95.4 (82.5–98.8)      |
| Kaplan–Meier 12-month estimate of DOR (95% CI) <sup>†</sup> | Not evaluable        | 89.0 (69.6–96.3)      | 86.0 (69.0–94.0)      |

2 CI, confidence interval; DOR, duration of response; IV, intravenous; ORR, objective response rate; Q2W, every 2  
3 weeks; Q3W, every 3 weeks.

4 \*Stable disease or response lasting ≥16 weeks.

5 <sup>†</sup>Percentages are based on number of patients with confirmed complete or partial response.

6 **Supplementary Table 2. Treatment-related adverse events reported in ≥5% of patients in either treatment group**

| Adverse event      | Group 3              |          | Group 1               |          | Total          |           |
|--------------------|----------------------|----------|-----------------------|----------|----------------|-----------|
|                    | Cemiplimab           |          | Cemiplimab            |          | (Groups 1 + 3) |           |
|                    | 350 mg IV Q3W (n=56) |          | 3 mg/kg IV Q2W (n=59) |          | (n=115)        |           |
|                    | Any Grade            | Grade ≥3 | Any Grade             | Grade ≥3 | Any Grade      | Grade ≥3  |
| Any                | 36 (64.3)            | 7 (12.5) | 46 (78.0)             | 9 (15.3) | 82 (71.3)      | 16 (13.9) |
| Fatigue            | 6 (10.7)             | 1 (1.8)  | 9 (15.3)              | 0 (0.0)  | 15 (13.0)      | 1 (0.9)   |
| Maculopapular rash | 5 (8.9)              | 1 (1.8)  | 8 (13.6)              | 0 (0.0)  | 13 (11.3)      | 1 (0.9)   |
| Rash               | 7 (12.5)             | 0 (0.0)  | 6 (10.2)              | 0 (0.0)  | 13 (11.3)      | 0 (0.0)   |
| Hypothyroidism     | 6 (10.7)             | 0 (0.0)  | 6 (10.2)              | 0 (0.0)  | 12 (10.4)      | 0 (0.0)   |
| Diarrhea           | 4 (7.1)              | 0 (0.0)  | 7 (11.9)              | 1 (1.7)  | 11 (9.6)       | 1 (0.9)   |
| Nausea             | 4 (7.1)              | 0 (0.0)  | 6 (10.2)              | 0 (0.0)  | 10 (8.7)       | 0 (0.0)   |
| Pneumonitis        | 2 (3.6)              | 0 (0.0)  | 6 (10.2)              | 3 (5.1)  | 8 (7.0)        | 3 (2.6)   |
| Pruritus           | 2 (3.6)              | 0 (0.0)  | 6 (10.2)              | 0 (0.0)  | 8 (7.0)        | 0 (0.0)   |
| Cough              | 1 (1.8)              | 0 (0.0)  | 5 (8.5)               | 0 (0.0)  | 6 (5.2)        | 0 (0.0)   |

|                    |          |         |          |         |         |         |
|--------------------|----------|---------|----------|---------|---------|---------|
| Alanine            |          |         |          |         |         |         |
| aminotransferase   | 1 (1.8)  | 0 (0.0) | 4 (6.8)  | 0 (0.0) | 5 (4.3) | 0 (0.0) |
| increased          |          |         |          |         |         |         |
| Aspartate          | 3 (5.4%) | 0 (0.0) | 2 (3.4%) | 0 (0.0) | 5 (4.3) | 0 (0.0) |
| aminotransferase   |          |         |          |         |         |         |
| increased          |          |         |          |         |         |         |
| Decreased appetite | 0        | 0 (0.0) | 5 (8.5)  | 0 (0.0) | 5 (4.3) | 0 (0.0) |
| Dry mouth          | 1 (1.8)  | 0 (0.0) | 4 (6.8)  | 0 (0.0) | 5 (4.3) | 0 (0.0) |
| Dysgeusia          | 1 (1.8)  | 0 (0.0) | 4 (6.8)  | 0 (0.0) | 5 (4.3) | 0 (0.0) |
| Arthralgia         | 1 (1.8)  | 0 (0.0) | 3 (5.1)  | 0 (0.0) | 4 (3.5) | 0 (0.0) |
| Dry skin           | 0 (0.0)  | 0 (0.0) | 4 (6.8)  | 0 (0.0) | 4 (3.5) | 0 (0.0) |
| Dizziness          | 0 (0.0)  | 0 (0.0) | 3 (5.1)  | 0 (0.0) | 3 (2.6) | 0 (0.0) |
| Vomiting           | 3 (5.4)  | 0 (0.0) | 0 (0.0)  | 0 (0.0) | 3 (2.6) | 0 (0.0) |

7 IV, intravenous; Q2W, every 2 weeks; Q3W, every 3 weeks.

8 Data are number of patients (%).

9 **Supplementary Table 3. Immune-related adverse events reported in ≥5% of patients in either treatment group (per**  
 10 **investigator assessment)**

|                                       | <b>Group 3</b>              |                 | <b>Group 1</b>               |                 | <b>Total</b>          |                 |
|---------------------------------------|-----------------------------|-----------------|------------------------------|-----------------|-----------------------|-----------------|
|                                       | <b>Cemiplimab</b>           |                 | <b>Cemiplimab</b>            |                 | <b>(Groups 1 + 3)</b> |                 |
|                                       | <b>350 mg IV Q3W (n=56)</b> |                 | <b>3 mg/kg IV Q2W (n=59)</b> |                 | <b>(n=115)</b>        |                 |
|                                       | <b>Any Grade</b>            | <b>Grade ≥3</b> | <b>Any Grade</b>             | <b>Grade ≥3</b> | <b>Any Grade</b>      | <b>Grade ≥3</b> |
| Overall immune-related adverse events | 32 (57.1)                   | 7 (12.5)        | 40 (67.8)                    | 8 (13.6)        | 72 (62.6)             | 15 (13.0)       |
| Maculopapular rash                    | 5 (8.9)                     | 1 (1.8)         | 8 (13.6)                     | 0 (0.0)         | 13 (11.3)             | 1 (0.9)         |
| Rash                                  | 7 (12.5)                    | 0 (0.0)         | 6 (10.2)                     | 0 (0.0)         | 13 (11.3)             | 0 (0.0)         |
| Hypothyroidism                        | 6 (10.7)                    | 0 (0.0)         | 6 (10.2)                     | 0 (0.0)         | 12 (10.4)             | 0 (0.0)         |
| Diarrhea                              | 3 (5.4)                     | 0 (0.0)         | 6 (10.2)                     | 1 (1.7)         | 9 (7.8)               | 1 (0.9)         |
| Pneumonitis                           | 2 (3.6)                     | 0 (0.0)         | 6 (10.2)                     | 3 (5.1)         | 8 (7.0)               | 3 (2.6)         |
| Fatigue                               | 2 (3.6%)                    | 1 (1.8%)        | 5 (8.5%)                     | 0 (0.0)         | 7 (6.1)               | 1 (0.9)         |
| Nausea                                | 3 (5.4)                     | 0 (0.0)         | 3 (5.1)                      | 0 (0.0)         | 6 (5.2)               | 0 (0.0)         |

|                                          |         |         |          |         |         |         |
|------------------------------------------|---------|---------|----------|---------|---------|---------|
| Pruritus                                 | 0 (0.0) | 0 (0.0) | 6 (10.2) | 0 (0.0) | 6 (5.2) | 0 (0.0) |
| Arthralgia                               | 1 (1.8) | 0 (0.0) | 3 (5.1)  | 0 (0.0) | 4 (3.5) | 0 (0.0) |
| Blood creatinine<br>increased            | 3 (5.4) | 0 (0.0) | 1 (1.7)  | 0 (0.0) | 4 (3.5) | 0 (0.0) |
| Cough                                    | 1 (1.8) | 0 (0.0) | 3 (5.1)  | 0 (0.0) | 4 (3.5) | 0 (0.0) |
| Alanine<br>aminotransferase<br>increased | 0 (0.0) | 0 (0.0) | 3 (5.1)  | 0 (0.0) | 3 (2.6) | 0 (0.0) |
| Dry skin                                 | 0 (0.0) | 0 (0.0) | 3 (5.1)  | 0 (0.0) | 3 (2.6) | 0 (0.0) |
| Dysgeusia                                | 0 (0.0) | 0 (0.0) | 3 (5.1)  | 0 (0.0) | 3 (2.6) | 0 (0.0) |

11 IV, intravenous; Q2W, every 2 weeks; Q3W, every 3 weeks.

12 Data are number of patients (%).

**Supplementary Table 4. Efficacy for CSCC patients treated at 350 mg IV Q3W  
(Group 3 study 1540) with high body weight (>120 kg)**

| <b>Weight on<br/>Cycle 1/Day 1<br/>(kg)</b> | <b>Number of doses of<br/>cemiplimab received</b> | <b>Best overall<br/>response</b> | <b>DOR (months)</b> |
|---------------------------------------------|---------------------------------------------------|----------------------------------|---------------------|
| 125.0                                       | 17                                                | PR                               | 4.17                |
| 145.0                                       | 3                                                 | PD                               |                     |
| 150.4                                       | 2*                                                | PD                               |                     |
| 171.6                                       | 15                                                | PR                               | 6.24 <sup>†</sup>   |

CSCC, cutaneous squamous cell carcinoma; DOR, duration of response; IV, intravenous; PD, progressive disease; PR, partial response; Q3W, every 3 weeks.

\*Reason for treatment discontinuation was worsening of psoriasis.

<sup>†</sup>Response ongoing at the time of data cut-off.
